# Supplementary material for: Macrophage-mediated tissue response evoked by subchronic inhalation of lead oxide nanoparticles is associated with the alteration of phospholipases C and cholesterol transporters
Source: PubMed Central journal article supplement (PMC9351260; doi:10.1186/s12989-022-00494-7), 2022-08-03
Supplement: 12989_2022_494_MOESM2_ESM.pdf [file 12989_2022_494_MOESM2_ESM.pdf]

# Cell cultures using generated nanoparticles plus analyses of liver tissues

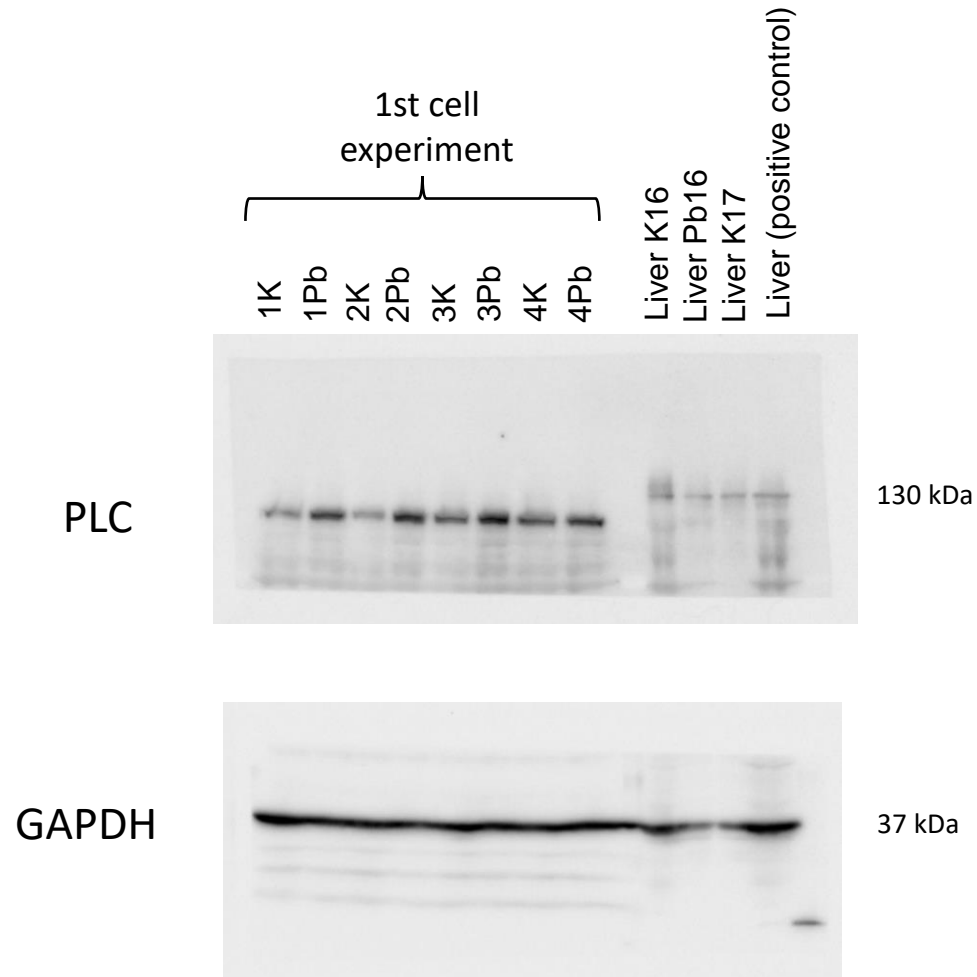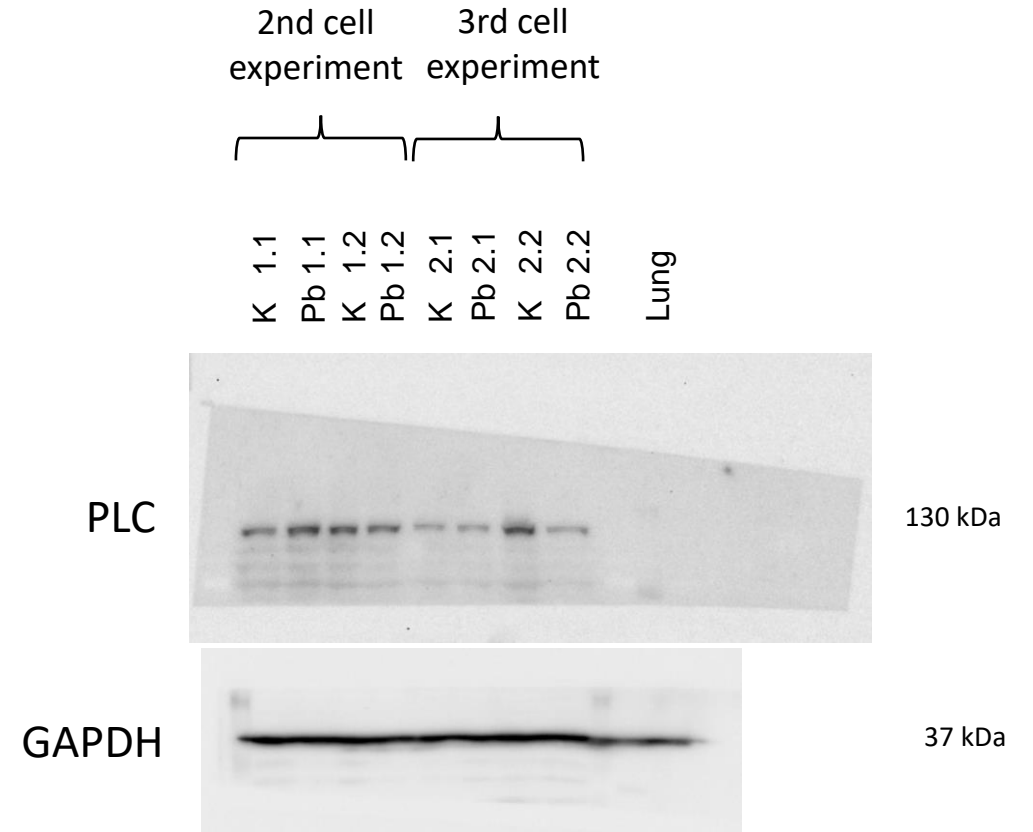

# Cell cultures using generated nanoparticles plus analyses of liver tissues

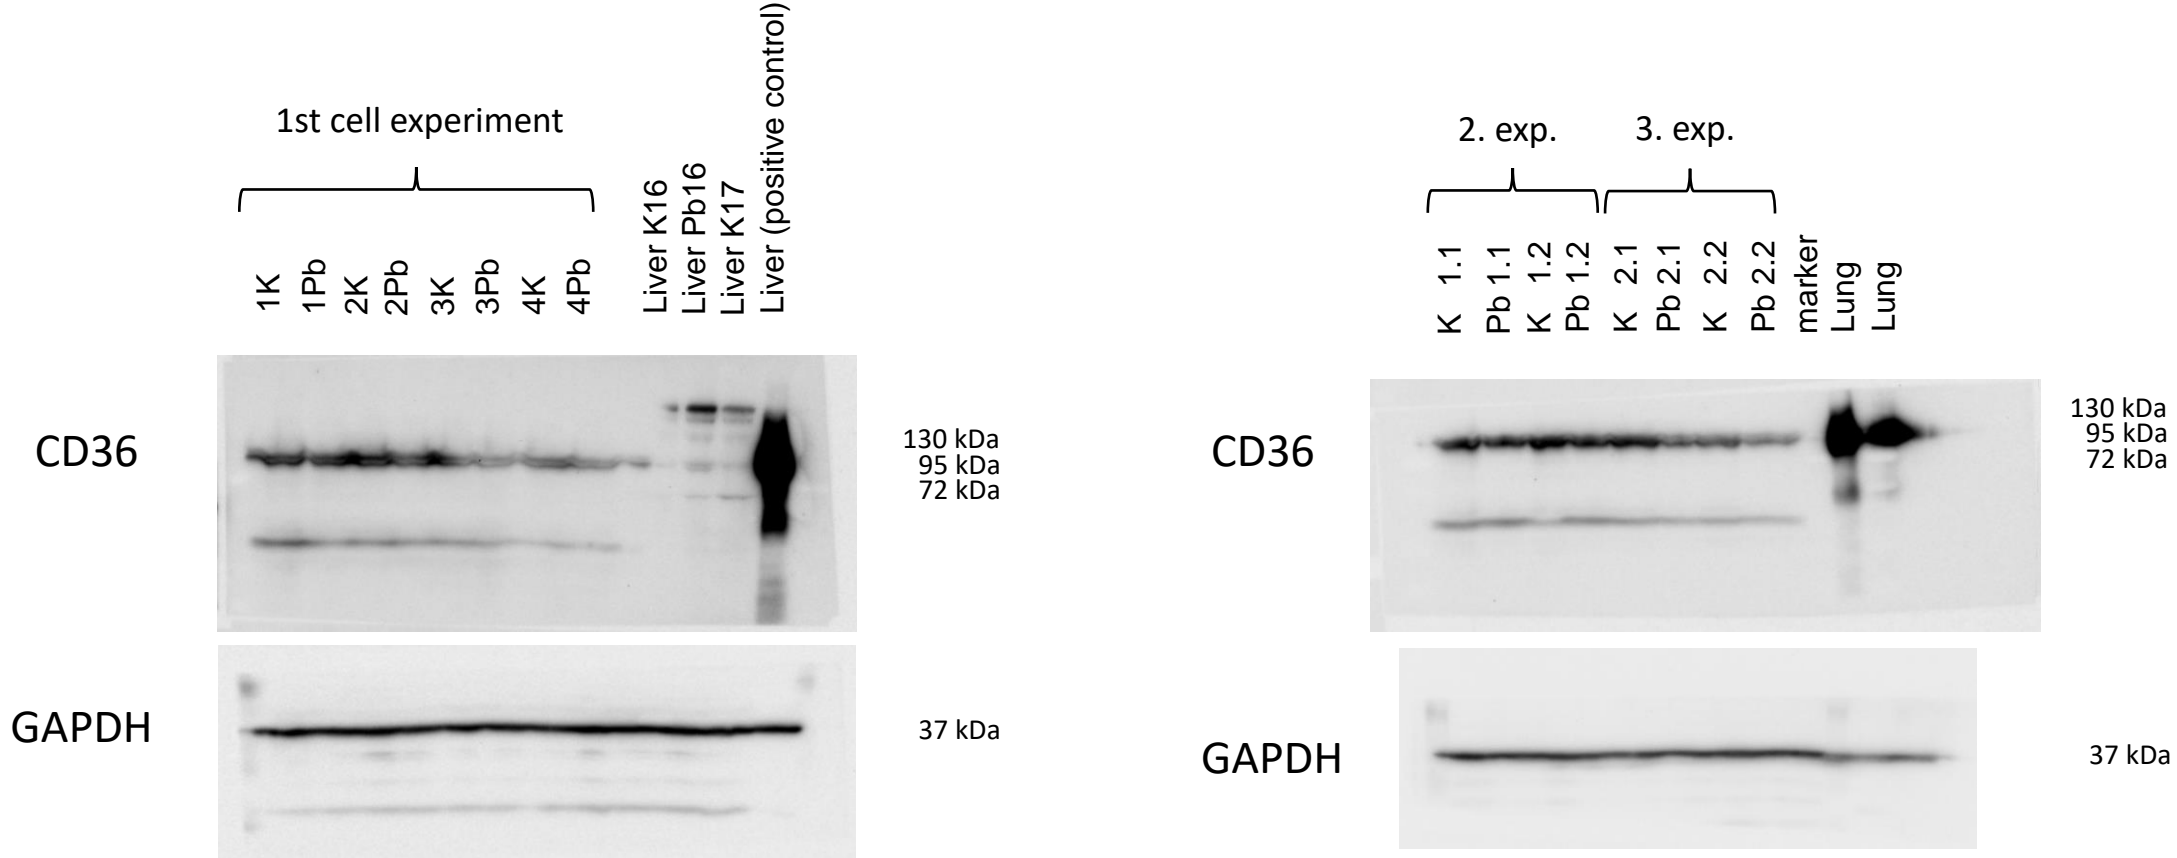

# Cell cultures using commercial nanoparticles plus analyses of liver tissues

1st cell experiment

MIHA 3/2/22 K1  
MIHA 3/2/22 Pb1  
MIHA 3/2/22 K3  
MIHA 3/2/22 Pb3  
MIHA 3/2/22 K4  
MIHA 3/2/22 Pb4  
MIHA 3/2/22 K5  
MIHA 3/2/22 Pb5  
MIHA 3/2/22 K6  
MIHA 3/2/22 Pb6  
MIHA 3/2/22 Pb2  
Lung

PLC

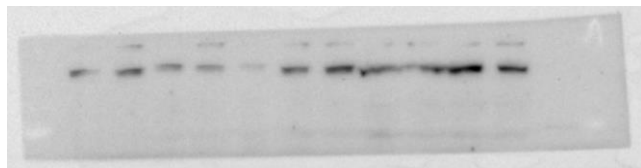

130 kDa

CD36

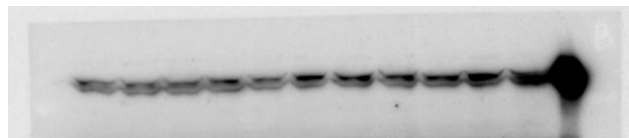

130 kDa  
95 kDa  
72 kDa

GAPDH

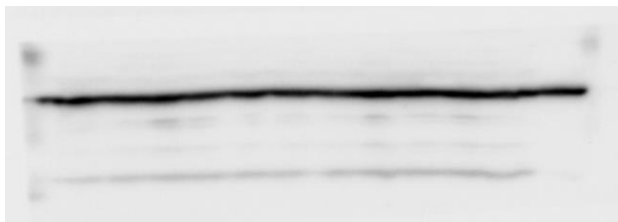

37 kDa

2nd cell experiment

K1 8.2.A  
Pb1 8.2.A  
K2 8.2.A  
Pb2 8.2.A  
K3 8.2.A  
Pb3 8.2.A  
K1 8.2.B  
Pb1 8.2.B  
K2 8.2.B  
Pb2 8.2.B  
K3 8.3.B  
Pb3 8.3.B  
Lung

PLC

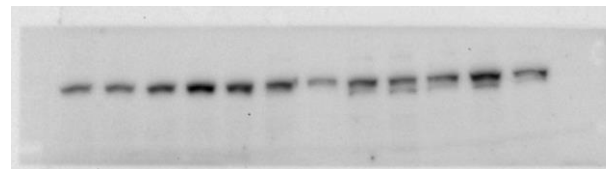

130 kDa

CD36

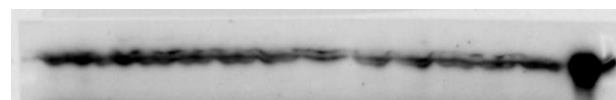

130 kDa  
95 kDa

GAPDH

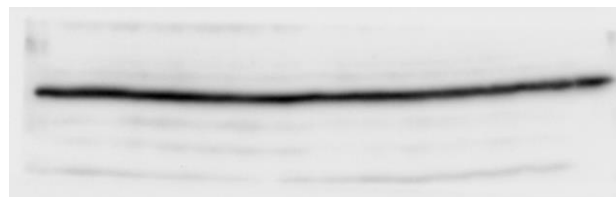

37 kDa

# Cell cultures using commercial nanoparticles plus analyses of liver tissues

3rd cell experiment

MIHA 2/12/22 K  
MIHA 2/12/22 Pb  
H441

PLC

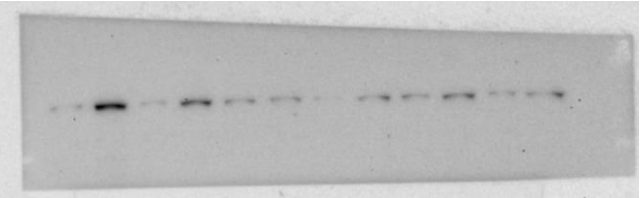

130 kDa

CD36

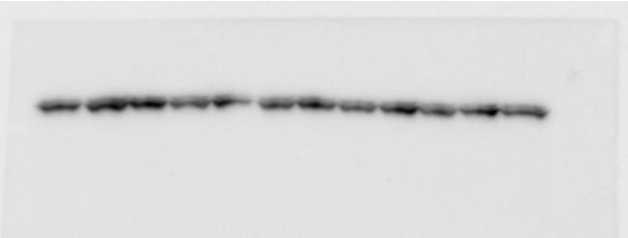

130 kDa  
95 kDa

GAPDH

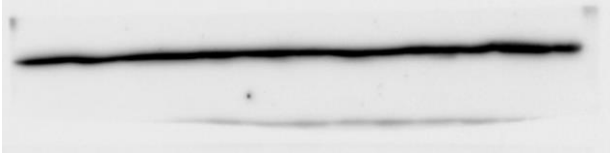

37 kDa

4th cell experiment

MIHA 23/11/22 K  
MIHA 23/11/22 Pb  
Liver K17  
Liver Pb16  
Liver K16

PLC

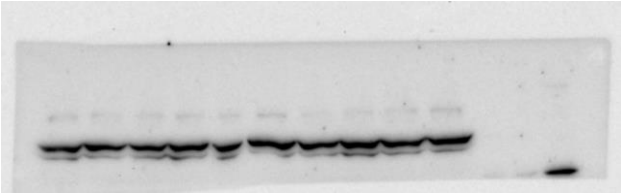

130 kDa  
95 kDa  
72 kDa

CD36

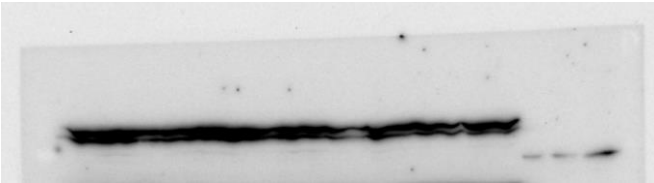

130 kDa  
95 kDa  
72 kDa

GAPDH

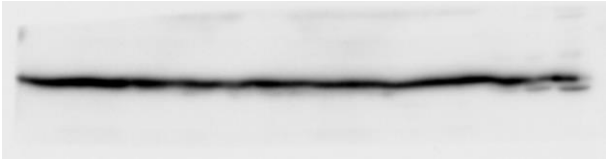

37 kDa
